# Supplementary material for: Narrative-Based Insights into Spiritual Health and Holistic Care for Advanced Cancer Patients: A Comparative Study Between Macao and Global Perspectives
Source: Research Square preprint supplement (doi:10.21203/rs.3.rs-7385385/v1), 2025-09-16
Supplement: Supplementary file 1 [file 2dfc755f01a4522c330ae07e.docx]

| **Table 1: Demographic Data of Participants** | | | | |  | |  |  |  |  |  |  |  |  |
| --- | --- | --- | --- | --- | --- | --- | --- | --- | --- | --- | --- | --- | --- | --- |
|  |  |  |  |  |  | |  |  |  |  |  |  |  |  |
| **Number** | **Married Status** | | **Educational Level** | | **Religious Belief** | | | **Occupation** | | **Cancer Type/PHQ-9 Score** | | | **Time Since Diagnosis** | |
| P1 | Married |  | Junior Secondary School | | Buddhism | | | Nursery Caregiver | | Right Breast Cancer/15 | | | 5 years |  |
| P2 | Married |  | Senior Secondary School |  | Buddhism | | | Appliance Repair Worker | | Malignant Neoplasm of Right Groin /4 | | | 4 months |  |
| P3 | Married |  | Senior Secondary School |  | | None |  | Garment Industry Technician | | Colon Cancer/8 | |  | 3 years |  |
| P4 | Married |  | Senior Secondary School |  | None | |  | Bank Clerk | | Endometrial Cancer/5 | | | 15 years |  |
| P5 | Married |  | Junior Secondary School | | None | |  | Technical Worker | | Malignant Renal Tumour/2 | |  | 6 years |  |

|  |  | |  | |
| --- | --- | --- | --- | --- |
|  |  | |  | |
|  |  | | | |
|  |  | |  | |
|  | |  | |
|  |  | |  | |
|  |  | |  | |
|  |  | |  | |
