# Supplementary material for: Narrative-Based Insights into Spiritual Health and Holistic Care for Advanced Cancer Patients: A Comparative Study Between Macao and Global Perspectives
Source: Research Square preprint supplement (doi:10.21203/rs.3.rs-7385385/v1), 2025-09-16
Supplement: Supplementary file 2 [file 97b2f463e1973ff5180c4d45.docx]

Interview Outline

**I. General Information**

Title of address:

Gender:

Age:

Diagnosis:

Course of illness:

Occupation:

Marital status:

Educational level:

Religious belief:

Family status:

**II. Questions on Spiritual Health**

1. Could you share your thoughts and feelings from the time you were diagnosed with cancer to now, as you’ve moved into the palliative care center?

2. What is your personal faith or belief in life?

3. During your illness, how has this faith or belief influenced your behavior?

4. What do you think gives your life meaning?

5. Is there a person or group of people whom you truly love or who are truly important to you?

6. What significant roles do you have in life? How do you view your fulfillment of these roles?

7. What are the things in your life that make you feel proud?

8. Are there any things in life that you feel regretful about?

9. What lessons or insights have you learned from life that you could share with others?

10. What activities or things help you feel relaxed and bring peace to your mind?

11. During the care process, what would you hope we could do to support your spiritual well-being?

12. Could you share your feelings after this narrative-sharing session?
